# Supplementary material for: (Micro)Biological Sediment Formation in a Non-Chlorinated Drinking Water Distribution System
Source: MDPI journal article supplement (doi:10.3390/w15020214), 2023-01-04
Supplement: s1 [file s1]

Archive with 1 entries (1 files):
- water-2082695-supplementary.pdf
