# Supplementary material for: (Micro)Biological Sediment Formation in a Non-Chlorinated Drinking Water Distribution System
Source: MDPI journal article supplement (doi:10.3390/w15020214), 2023-01-04
Supplement: s1 [file s1 › water-2082695-supplementary.pdf]

## Supplementary material

### Overview of pipe materials in the study and the reference distribution systems

**Table S1. Length of different pipe materials in the study system and the reference system**

| Material                         | Study system |                   | Reference system |                   |
|----------------------------------|--------------|-------------------|------------------|-------------------|
|                                  | km           | % of total length | km               | % of total length |
| Asbestos Cement                  | 1024         | 37                | 1210             | 52                |
| Polyvinylchloride                | 838          | 31                | 575              | 25                |
| Polyester                        | 606          | 22                | 325              | 14                |
| Ductile cast iron                | 118          | 4                 | 99               | 4                 |
| Gray cast iron                   | 45           | 2                 | 35               | 2                 |
| Concrete                         | 58           | 2                 | 31               | 1                 |
| Steel                            | 46           | 2                 | 53               | 2                 |
| Polyester Aluminum composite     | 4            | <1                | 3                | <1                |
| Glass fiber reinforced polyester | 2            | <1                | 1                | <1                |
| Copper                           | 1            | <1                | <1               | <1                |

### Water quality in the study system and reference system

**Table S2. Water quality at the outlets of the treatment plants supplying water to the study system (location A1) and the reference system (location A2).**

| Parameter                | Study system (A1) | Reference system (A2) |
|--------------------------|-------------------|-----------------------|
| TOC (mg/L)               | 1.1 ± 0.3         | 1.1 ± 0.2             |
| AOC (µg Ac-C/L)          | 11.7 ± 3.4        | 4.3 ± 2.5             |
| Ammonium (mg/L)          | <0.02             | <0.02                 |
| Nitrate (mg/L)           | 4.6 ± 2.2         | 2.5 ± 1.2             |
| Ortho-phosphate (µg P/L) | 8 ± 10            | 14 ± 4                |
| Dissolved iron (µg/L)    | <10               | <10                   |

**Table S3. Microbial changes in the study system and reference system. Comparison of microbial measurements at the treatment effluents (A1 and A2) and of average values of measurements at various distribution locations.**

| Parameter                     | Study system                              |                                           | Reference system                          |                                           |
|-------------------------------|-------------------------------------------|-------------------------------------------|-------------------------------------------|-------------------------------------------|
|                               | Treatment (A1)                            | Distribution                              | Treatment (A2)                            | Distribution                              |
| HPC (CFU/mL)                  | 4 ± 22                                    | 41 ± 212                                  | 2 ± 16                                    | 13 ± 219                                  |
| <i>Aeromonas</i> (CFU/100 mL) | 1 ± 4                                     | 442 ± 1039                                | 2 ± 6                                     | 65 ± 285                                  |
| Total cell counts (cells/mL)  | 3.7×10 <sup>5</sup> ± 4.6×10 <sup>5</sup> | 3.2×10 <sup>5</sup> ± 2.1×10 <sup>5</sup> | 2.4×10 <sup>5</sup> ± 0.5×10 <sup>5</sup> | 2.6×10 <sup>5</sup> ± 2.7×10 <sup>5</sup> |
| Intact cell counts (cells/mL) | 0.6×10 <sup>5</sup> ± 1.0×10 <sup>5</sup> | 0.9×10 <sup>5</sup> ± 1.0×10 <sup>5</sup> | 2.0×10 <sup>5</sup> ± 0.5×10 <sup>5</sup> | 2.1×10 <sup>5</sup> ± 2.1×10 <sup>5</sup> |
| % intact cells                | 16% ± 9%                                  | 33% ± 19%                                 | 83% ± 3%                                  | 79% ± 29%                                 |
| Total ATP (ng/L)              | 2.0 ± 2.4                                 | 3.5±4.3 ng/L                              | 1.8 ± 1.9                                 | 1.7±2.4 ng                                |

### Conversion of number of organisms to biomass

**Table S4.** Biomass per individual for a selection of invertebrates observed in sediment collected from two non-chlorinated distribution systems. Only full invertebrates were taken into account for the biomass calculation (parts of dead Asellus not taken into account). From: Ketelaars et al., 2022 [42].

| Description       | Group                       | Biomass ( $\mu\text{g}/\text{individual}$ ) |
|-------------------|-----------------------------|---------------------------------------------|
| Round worms       | Nematoda                    | 0.14                                        |
| Flatworms         | Turbellaria                 | 10.1                                        |
| Water fleas       | Chydoridae                  | 10                                          |
| Copepods larvae   | Nauplius larvae of copepods | 1.89                                        |
| Copepods          | Cyclopoida                  | 10                                          |
| Copepods          | Harpacticoida               | 4                                           |
| Water louse       | Isopoda - Asellidae         | 1680                                        |
| Water mites       | Halacaridae                 | 2.5                                         |
| Lake flies larvae | Chironomidae                | 70.6                                        |
| Ringed worms      | Oligochaeta                 | 16.7                                        |
| Snails            | Gastropoda                  | 300                                         |

### FTIR, XRD and SEM spectra of sediment collected in the study system

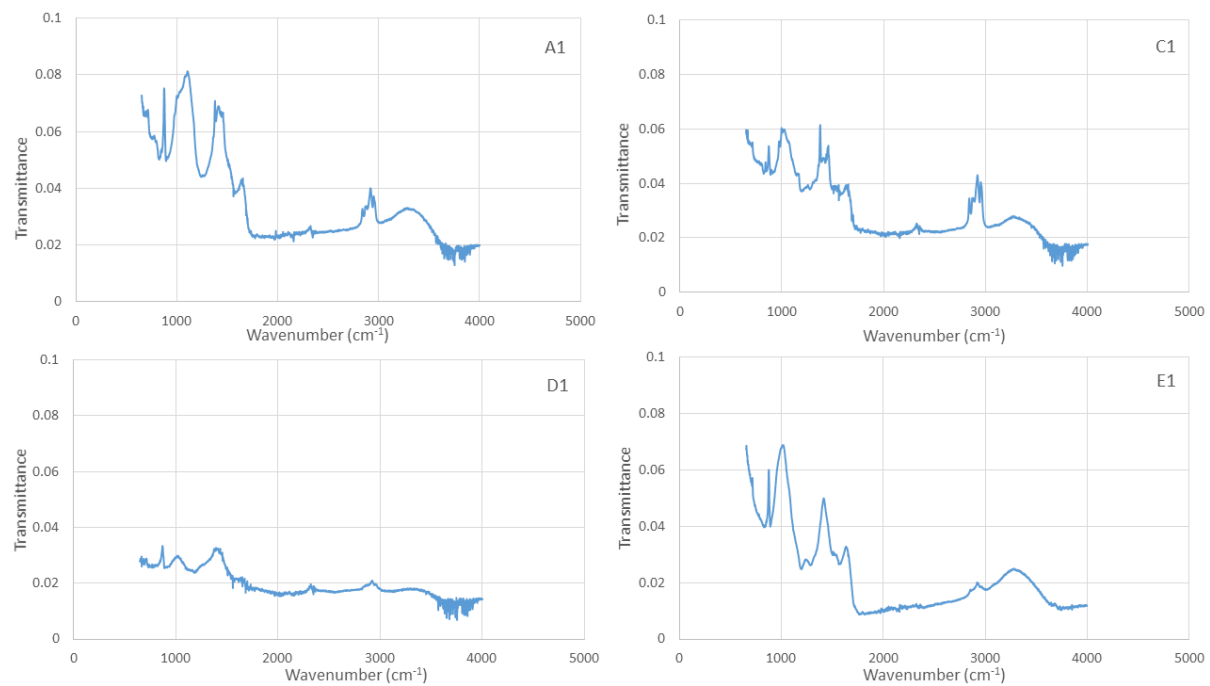

**Figure S1.** FTIR spectra of sediment samples collected in the study system at locations A1, C1, D1 and E1.

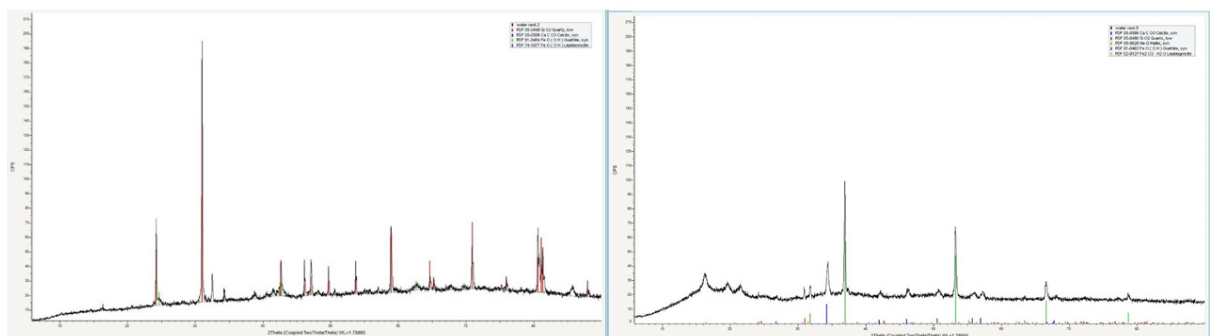

**Figure S2.** Examples of XRD spectra

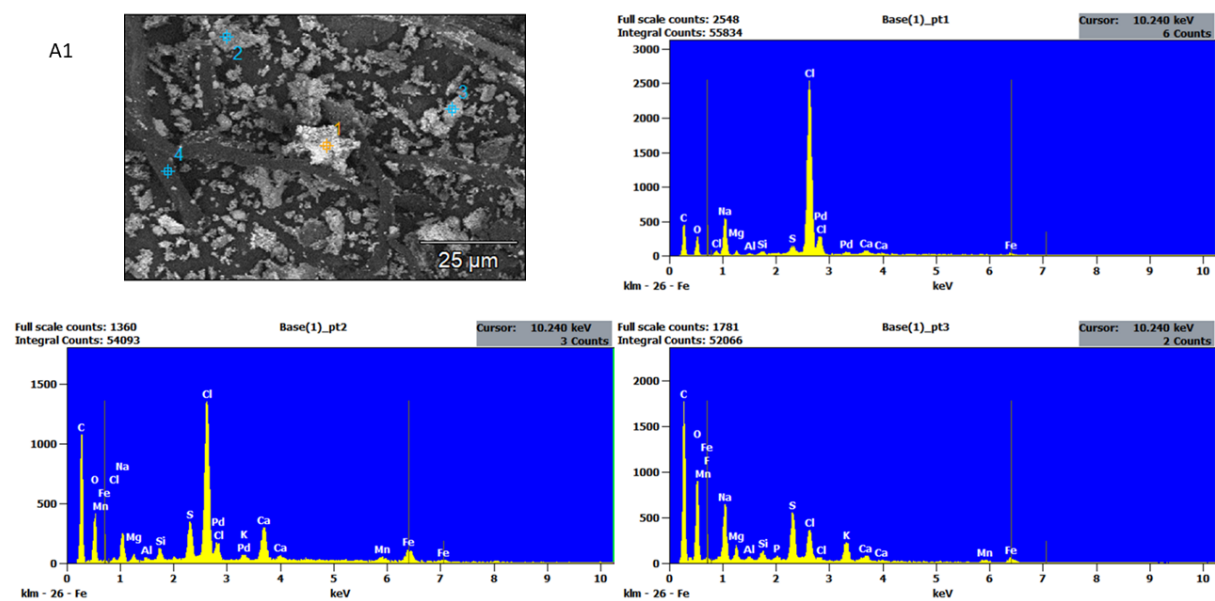

**Figure S3.** SEM-EDX picture and spectra of sediment collected at location A1 in the study system. The spectra were generated at the points indicated on the microscopic picture.

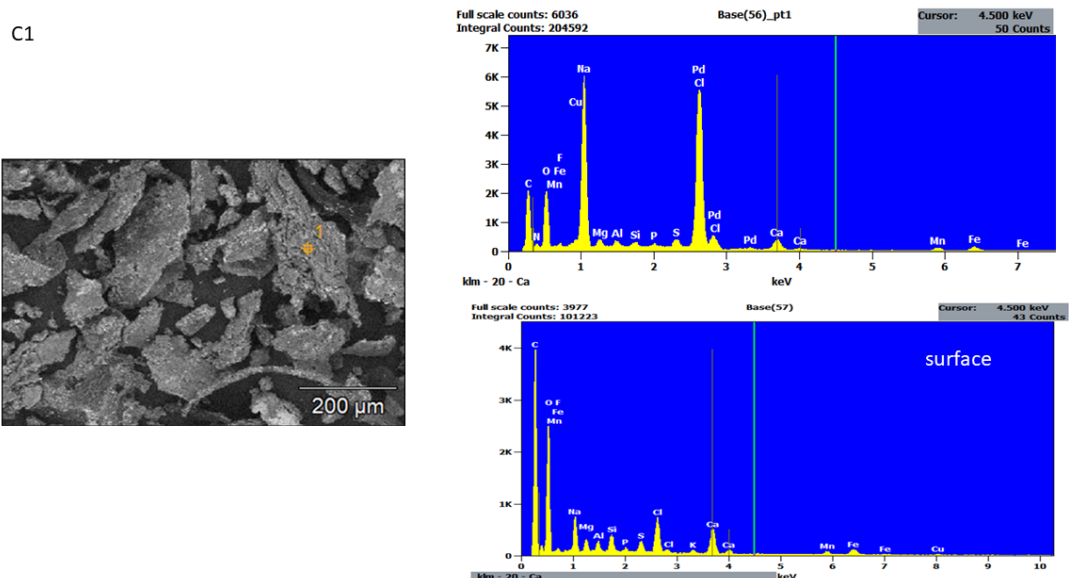

**Figure S4.** SEM-EDX picture and spectra of sediment collected at location C1 in the study system. The spectra were generated at the points indicated on the microscopic picture.

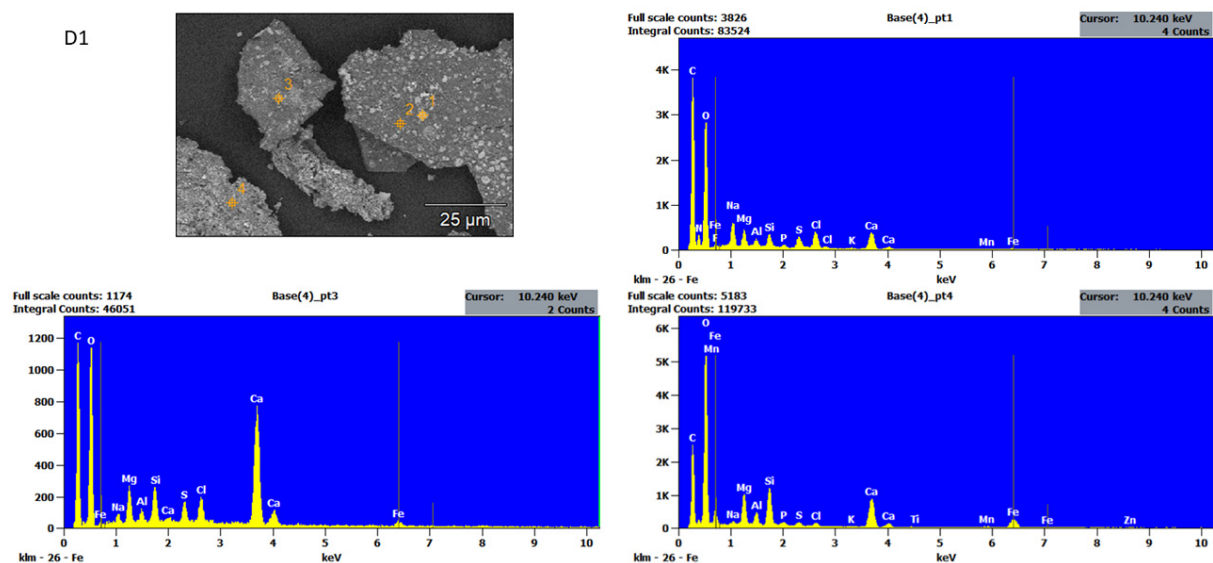

**Figure S5.** SEM-EDX picture and spectra of sediment collected at location D1 in the study system. The spectra were generated at the points indicated on the microscopic picture.

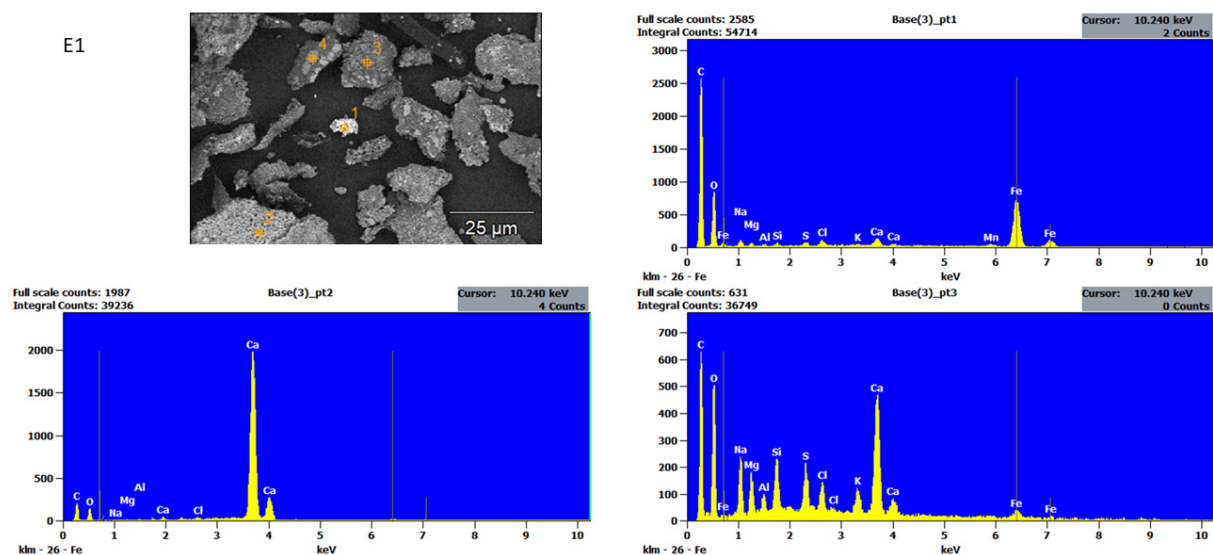

**Figure S6.** SEM-EDX picture and spectra of sediment collected at location E1 in the study system. The spectra were generated at the points indicated on the microscopic picture.

### *Sediment analysis of reference system*

Detailed analysis of sediment collected in the reference system was performed at one distribution location only (E2). Sediment was collected by pipe flushing (and not with filters as used at other locations). Two fractions were collected over 30 µm and 100 µm filters and analyzed separately.

**Table S5.** Summary of wavenumbers in FTIR spectrum for samples collected at one location in the reference system by pipe flushing through a 30 µm and a 100 µm filter. Wavenumbers related to organic functional groups are in **indicated in bold**; Wavenumbers which are connected to inorganic functional groups are underlined.

| Location    | Wavenumber (cm <sup>-1</sup> )                                                        | Compounds                   |
|-------------|---------------------------------------------------------------------------------------|-----------------------------|
| E2 (30 µm)  | <b>3300</b> , 2648, <b>1632</b> , <u>1423</u> , 994, <u>874</u> (very strong)         | Proteins, CaCO <sub>3</sub> |
| E2 (100 µm) | <b>3300</b> , 2928, <b>1632</b> , <u>1423</u> , <u>995</u> , <u>873</u> (very strong) | Proteins, CaCO <sub>3</sub> |

**Table S6.** Crystallized minerals in the samples collected in the reference system.

| Location    | CaCO <sub>3</sub><br>% | SiO <sub>2</sub><br>% | NaCl<br>% | FeO(OH)+ Fe <sub>2</sub> O <sub>3</sub> H <sub>2</sub> O<br>% |
|-------------|------------------------|-----------------------|-----------|---------------------------------------------------------------|
| E2 (30 µm)  | 66.1                   | 21.2                  | -         | 4.3+8.5                                                       |
| E2 (100 µm) | 7.9                    | 73.4                  | -         | 7.5+11.1                                                      |

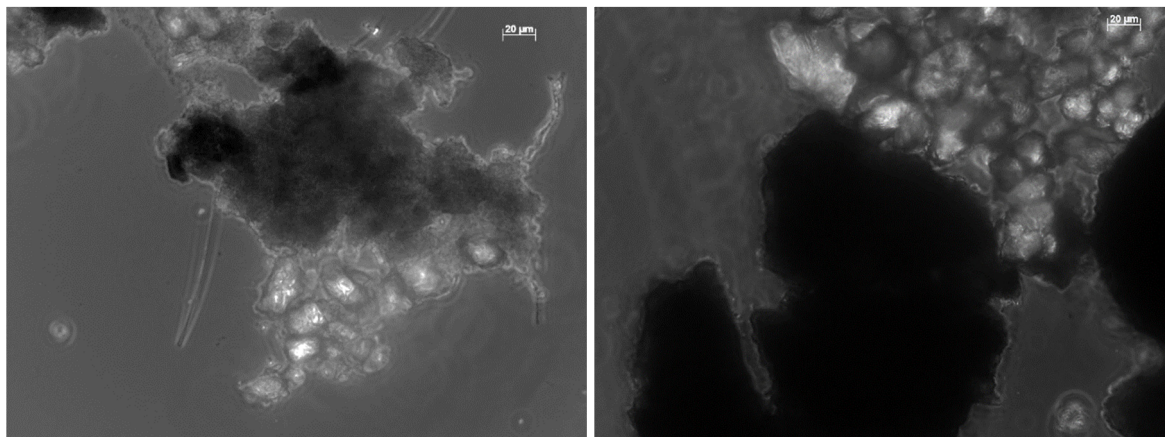

**Figure S7.** microscope pictures of sediment collected in the reference system through a 30 µm (left) and 100 µm (right) filter after pipe flushing.
